# Supplementary material
Source: MDPI journal article supplement (https://www.mdpi.com/2304-6740/10/4/54)
Supplement: s1 [file s1]

# Enhanced Photocatalytic Activity of WS<sub>2</sub>/TiO<sub>2</sub> Nanofibers for Degradation of Phenol under Visible Light Irradiation

Engy A. Nada <sup>1</sup>, Heba H. El-Maghrabi <sup>2</sup>, Patrice Raynaud <sup>3</sup>, Hager R. Ali <sup>4</sup>,  
Saad Abd El-Wahab <sup>1</sup>, Dina Y. Sabry <sup>1</sup>, Yasser M. Moustafa <sup>4</sup>, and Amr A. Nada <sup>4,\*</sup>

<sup>1</sup> Chemistry Department, Faculty of Science, Ain shams University, Cairo 11566, Egypt; engyahmedna-da@gmail.com (E.A.N.); saadabdelwahab@sci.asu.edu.eg (S.A.E.-W.); d.y\_sabry@yahoo.com (D.Y.S)

<sup>2</sup> Dept. of Refining, Egyptian Petroleum Research Institute, Cairo 11727, Egypt; hebachem@yahoo.com (H.H.E.)

<sup>3</sup> Laboratoire Plasma et Conversion d'Energie (LAPLACE), Université de Toulouse, CNRS, INPT, UPS, 31062 Toulouse, France; raynaud@laplace.univ-tlse.fr

<sup>4</sup> Dept. of Analysis and Evaluation, Egyptian Petroleum Research Institute, Cairo 11727, Egypt; d\_hager80@yahoo.com (H.R.A.); ymoustafa12@yahoo.com (Y.M.M.).

\* Correspondence: hebachem@yahoo.com (H.H.E.-M.); amr.nada@epri.sci.eg or chem\_amr@yahoo.com (A.A.N.)

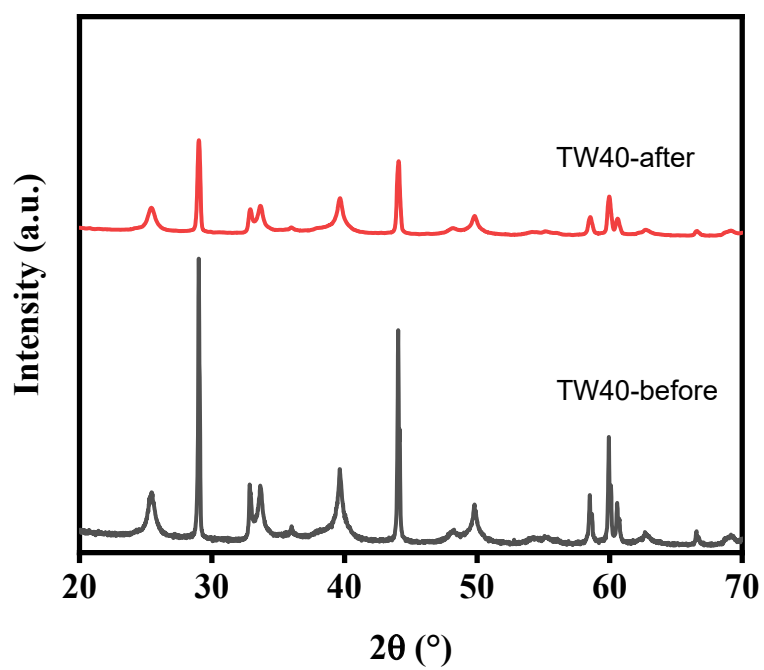

Figure S1: XRD of TW40 nanofibers before and after photocatalytic reaction..

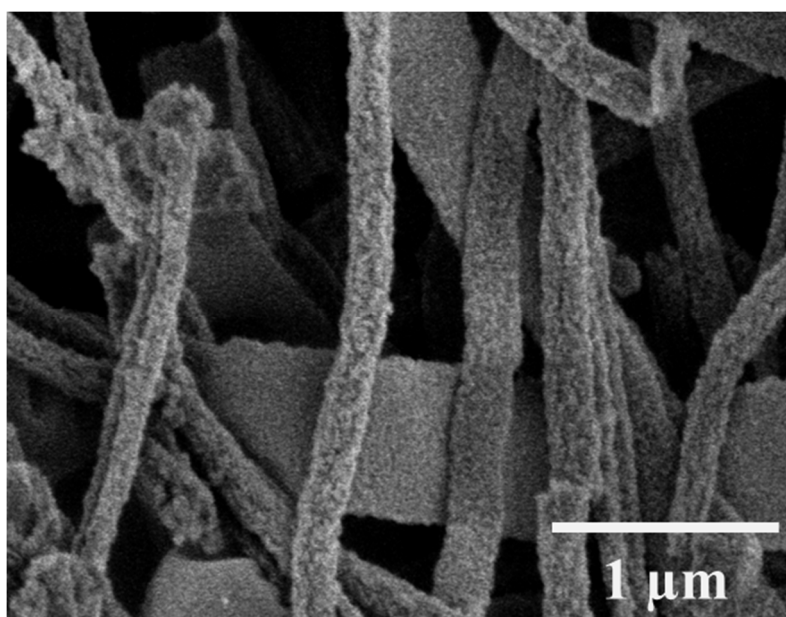

Figure S2: SEM of TW40 nanofibers after photocatalytic reaction.
